# Supplementary material
Source: publisher figshare collection journal article supplement (https://acs.figshare.com/ndownloader/files/11791355)
Supplement: Supplementary file 1 [file 11791355]

## Supporting Information

### Identification of active sites over Fe<sub>2</sub>O<sub>3</sub>-based architecture:

#### The promotion effect of H<sub>2</sub>SO<sub>4</sub> erosion synthetic protocol

Jie Zhang,<sup>‡a</sup> Zhiwei Huang,<sup>\*‡a</sup> Yueyao Du,<sup>a</sup> Francisco Sánchez-Ochoa,<sup>b</sup> Xiaomin Wu<sup>a</sup> and Guohua Jing<sup>\*a</sup>

<sup>a</sup> Department of Environmental Science & Engineering, Huaqiao University, Xiamen 361021, P. R. China.

<sup>b</sup> Instituto de Física, Universidad Nacional Autónoma de México - Apartado Postal 20-364, Cd. de México C. P. 01000, México.

#### Corresponding Author

\* zwhuang1988@163.com; zhoujing@hqu.edu.cn

#### Catalytic performance evaluation

The performance of catalysts for the NH<sub>3</sub>-SCR of NO was carried out in a fixed bed glass reactor with inner diameter of 6 mm under steady state reaction conditions. The composition of gas mixture was: 600 ppm NO, 600 ppm NH<sub>3</sub>, 3 vol% O<sub>2</sub>, 300 ppm SO<sub>2</sub> (when used), 10 vol% H<sub>2</sub>O (when used) and N<sub>2</sub> as the balance. The flow rate of the feeding gases was 600 mL min<sup>-1</sup>. The catalysts (0.5 g) were pressed into blocks, crushed and sieved with 40–60 meshes before used. The concentrations of NO were continually monitored by a testo 340 flue gas analyzer. N<sub>2</sub> selectivity and outlet N<sub>2</sub>O concentration were measured by Thermo Scientific Antaris IGS analyzer.

To calculate the NO conversion ratio, we use the next formula:

$$\text{NO Conversion (\%)} = \frac{[\text{NOx}]_{\text{in}} - [\text{NOx}]_{\text{out}}}{[\text{NOx}]_{\text{in}}} \times 100 \%$$

#### Additional Figures and Data

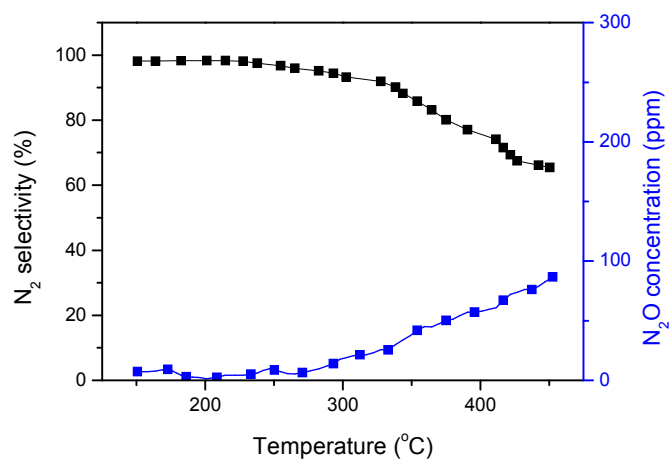

Figure S1. N<sub>2</sub> selectivity and outlet N<sub>2</sub>O concentration versus temperature data over parent Fe<sub>2</sub>O<sub>3</sub>. Reactant feed contains 600 ppm of NO, 600 ppm of NH<sub>3</sub>, 3 vol% O<sub>2</sub>, balanced with N<sub>2</sub>.

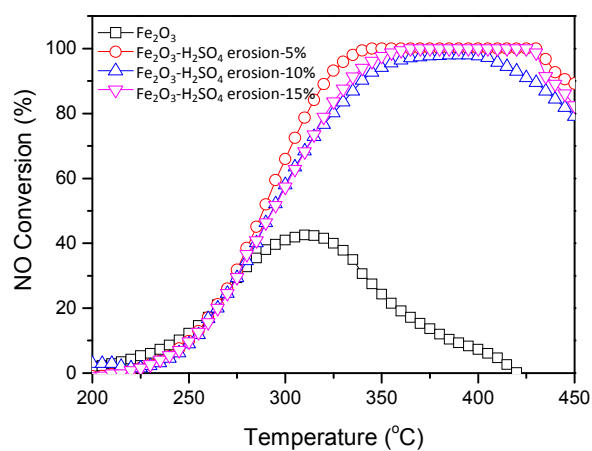

Figure S2. NO conversion versus temperature data over parent Fe<sub>2</sub>O<sub>3</sub> and Fe<sub>2</sub>O<sub>3</sub>-H<sub>2</sub>SO<sub>4</sub> erosion samples. Reactant feed contains 600 ppm of NO, 600 ppm of NH<sub>3</sub>, 3 vol% O<sub>2</sub>, balanced with N<sub>2</sub>.

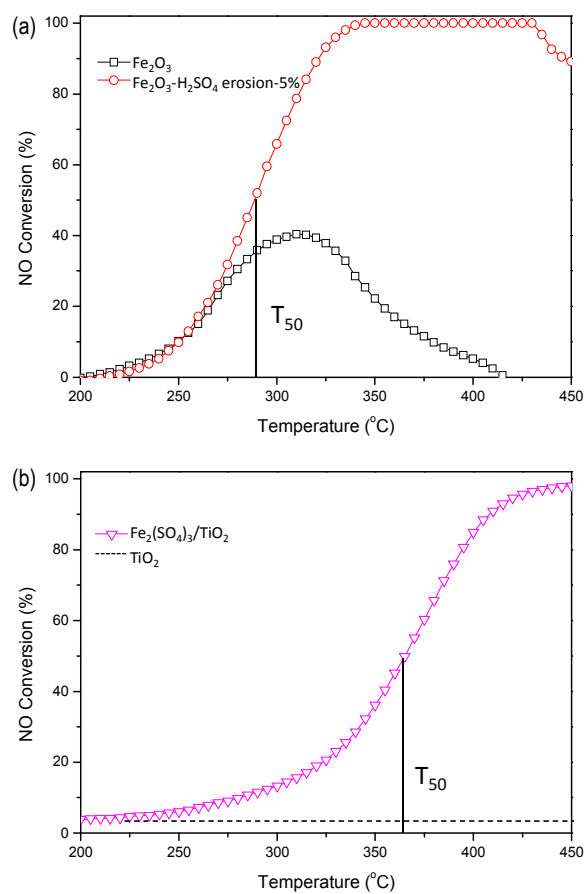

Figure S3. NO conversion versus temperature data over (a)  $\text{Fe}_2\text{O}_3\text{-H}_2\text{SO}_4$  erosion-5%,  $\text{Fe}_2\text{O}_3$  samples and (b)  $\text{Fe}_2(\text{SO}_4)_3/\text{TiO}_2$ ,  $\text{TiO}_2$  samples. Reactant feed contains 600 ppm of NO, 600 ppm of  $\text{NH}_3$ , 3 vol%  $\text{O}_2$ , balanced with  $\text{N}_2$ .  $T_{50}$  (temperature of 50% conversion) of  $\text{Fe}_2\text{O}_3\text{-H}_2\text{SO}_4$  erosion-5% sample is much lower than that of  $\text{Fe}_2(\text{SO}_4)_3/\text{TiO}_2$ , despite that these two catalyst has identical  $\text{Fe}_2(\text{SO}_4)_3$  loading amount.

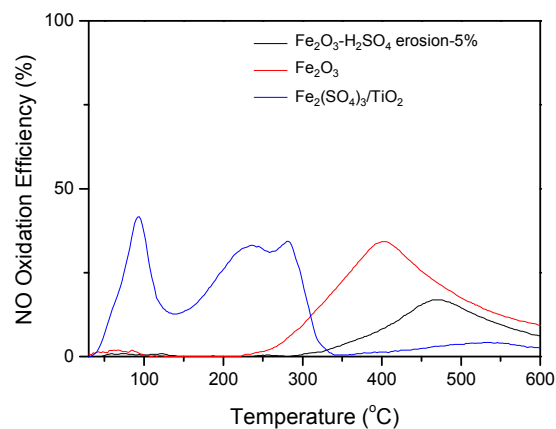

Figure S4. The NO probe molecule temperature-programmed oxidation (TPO) of as-prepared  $\text{Fe}_2\text{O}_3\text{-H}_2\text{SO}_4$  erosion sample,  $\text{Fe}_2\text{O}_3$  and  $\text{Fe}_2(\text{SO}_4)_3/\text{TiO}_2$ . Reactant feed contains 600 ppm of NO, 3 vol% of  $\text{O}_2$ , balanced with  $\text{N}_2$ .

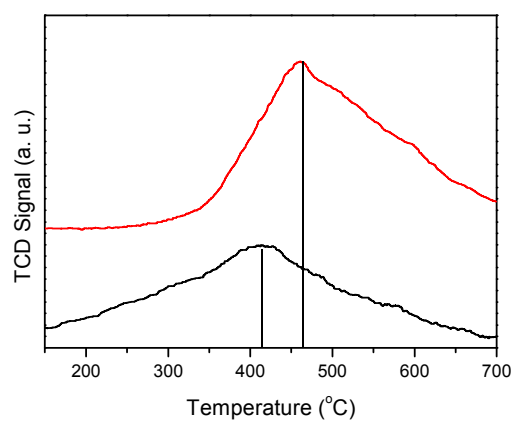

Figure S5. The  $\text{NH}_3$  temperature-programmed desorption (TPD) of  $\text{Fe}_2\text{O}_3$  (black) and  $\text{Fe}_2\text{O}_3\text{-H}_2\text{SO}_4$  erosion-5% sample (red).
